# Supplementary material for: Acute and short-term administrations of delta-9-tetrahydrocannabinol modulate major gut metabolomic regulatory pathways in C57BL/6 mice
Source: Springer Nature journal article supplement (doi:10.1038/s41598-019-46478-0), 2019-07-19
Supplement: MOESM1 [file 41598_2019_46478_MOESM1_ESM.pdf]

## **SUPPLEMENTARY INFORMATION**

### **Acute and short-term administrations of delta-9-tetrahydrocannabinol modulate major gut metabolomic regulatory pathways in C57BL/6 mice**

Megha Oza<sup>‡, 1</sup>, William Becker<sup>‡, 2</sup>, Phani M. Gummadidala<sup>‡, 1</sup>, Travis Dias<sup>‡, 1</sup>, Mayomi H. Omebeyinje<sup>1</sup>, Li Chen<sup>3</sup>, Chandrani Mitra<sup>1</sup>, Rubaiya Jesmin<sup>1</sup>, Paramita Chakraborty<sup>4</sup>, Mathew Sajish<sup>5</sup>, Lorne J. Hofseth<sup>5</sup>, Koyeli Banerjee<sup>6</sup>, Qian Wang<sup>7</sup>, Peter D. R. Moeller<sup>8</sup>, Mitzi Nagarkatti<sup>2</sup>, Prakash Nagarkatti<sup>2</sup> and Anindya Chanda<sup>\*, 1</sup>

#### **Affiliations**

<sup>1</sup> Environmental Health Sciences, Arnold School of Public Health, University of South Carolina, Columbia, SC, USA

<sup>2</sup> Department of Pathology, Microbiology, and Immunology, School of Medicine, University of South Carolina, Columbia, SC, USA

<sup>3</sup> Creative Proteomics Inc., Shirley, New York, USA

<sup>4</sup> Department of Statistics, University of South Carolina, Columbia, SC, USA

<sup>5</sup> Drug Discovery and Biomedical Sciences, College of Pharmacy, University of South Carolina, Columbia, SC, USA

<sup>6</sup> National Institute of Health, Bethesda, MD, USA

<sup>7</sup> Department of Chemistry and Biochemistry, University of South Carolina, Columbia, SC, USA

<sup>8</sup> National Ocean Service, Hollings Marine Laboratory, Charleston, SC, USA

<sup>‡</sup> Co-primary authors

\* Author for correspondence: [achanda@mailbox.sc.edu](mailto:achanda@mailbox.sc.edu)

Before Normalization

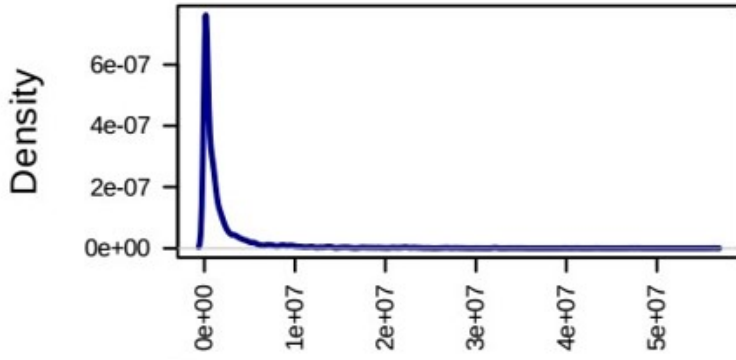

After Normalization

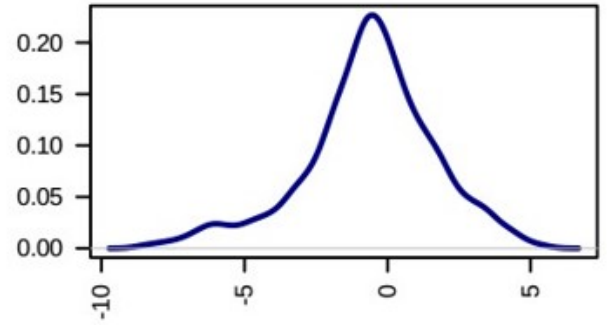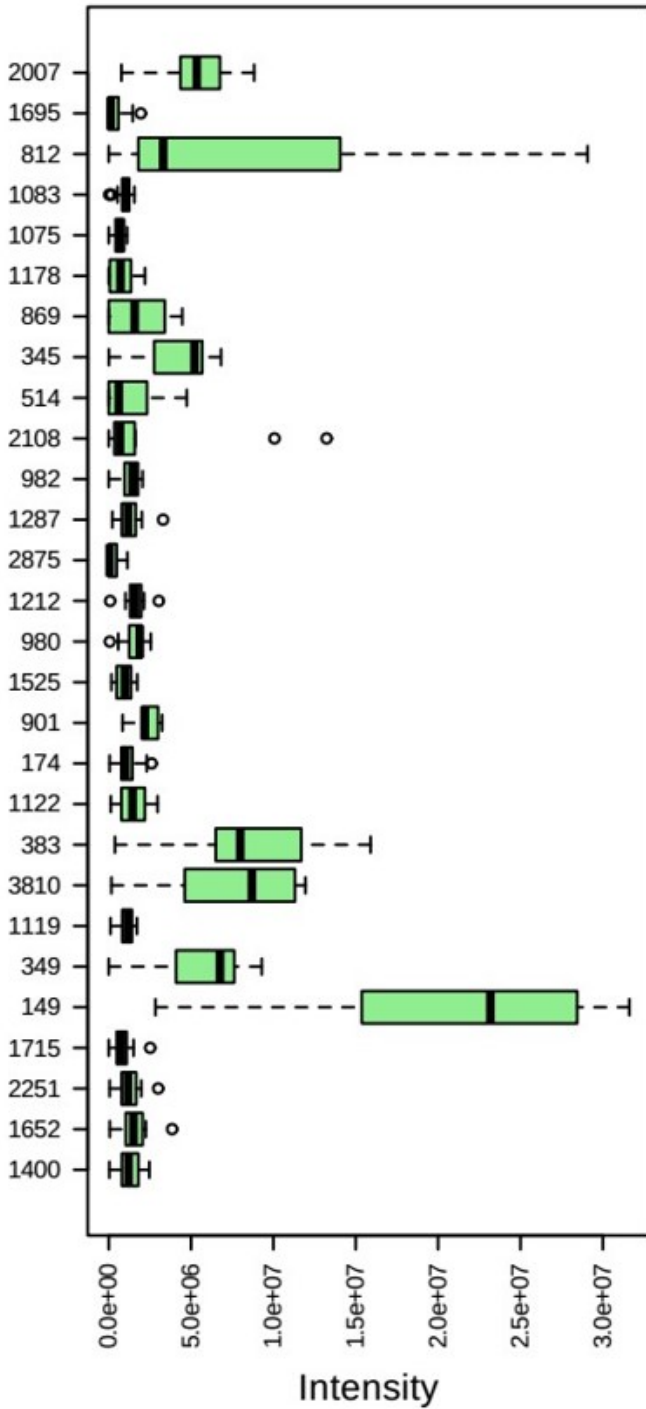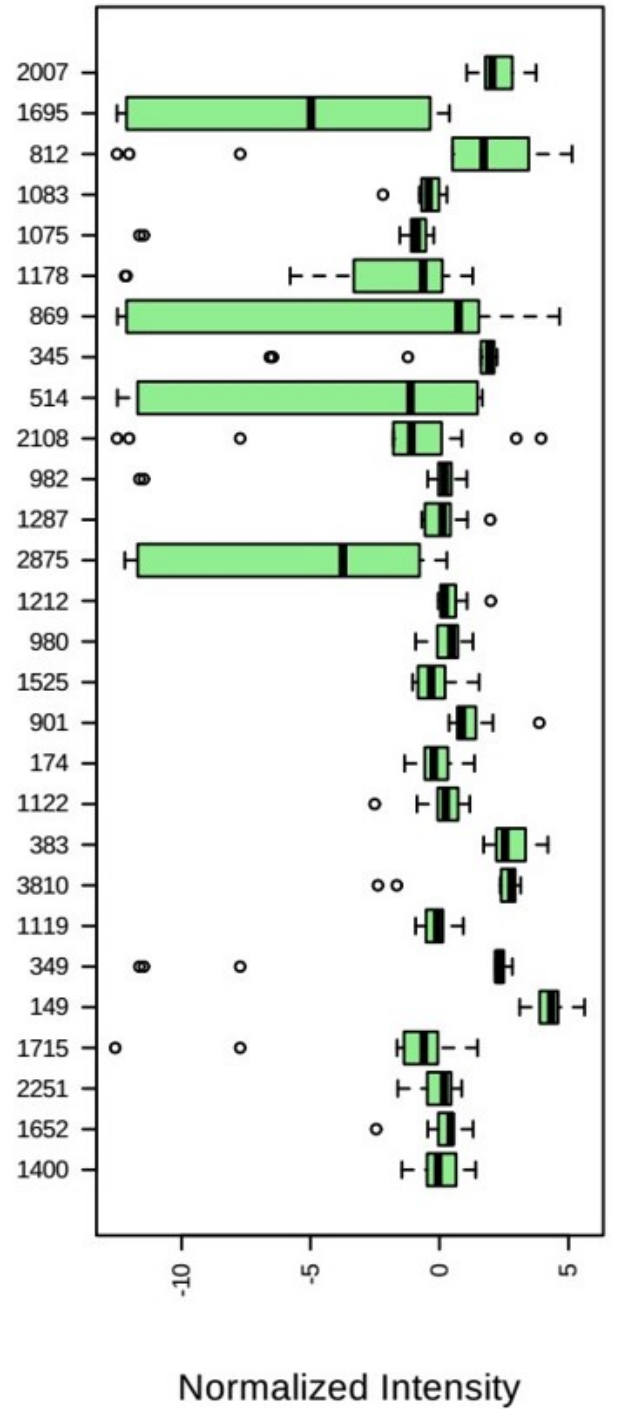

1 **SI Fig 1. Normalization of ion peak intensities** The raw data generated from Mass  
2 Hunter workstation was stored as a table with one sample per row and one variable  
3 (bin/peak/metabolite) per column. For comparability of metabolite profiles between  
4 samples, we implemented a three-category data normalization procedure that included:  
5 (a) sample specific normalization involving manual adjustment of concentrations based on  
6 biological inputs (i.e. volume, mass), (b) row-wise normalization, a normalization by the  
7 sample median for adjustment of differences among samples, and (c) a generalized log  
8 transformation of data (gLog2). Density plots and box plots before and after normalization  
9 are shown. The boxplots show at most 50 features due to space limit. The density plots  
10 are based on all samples.  
11

Negative mode

Positive mode

Sampling points

1X

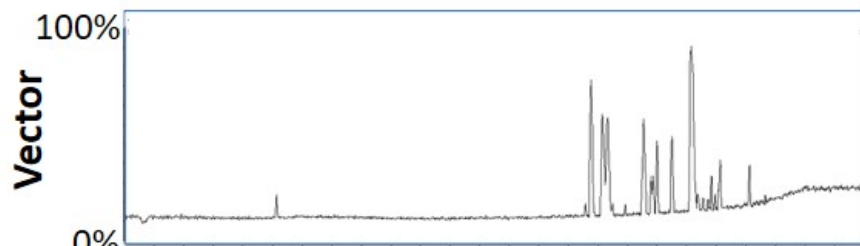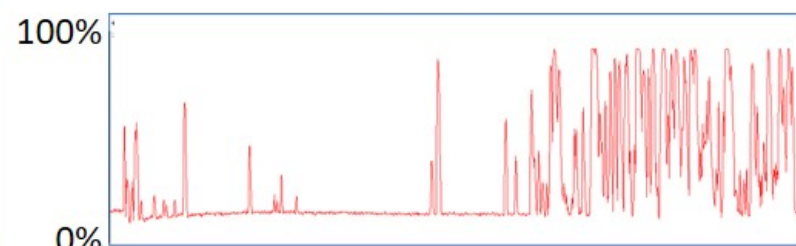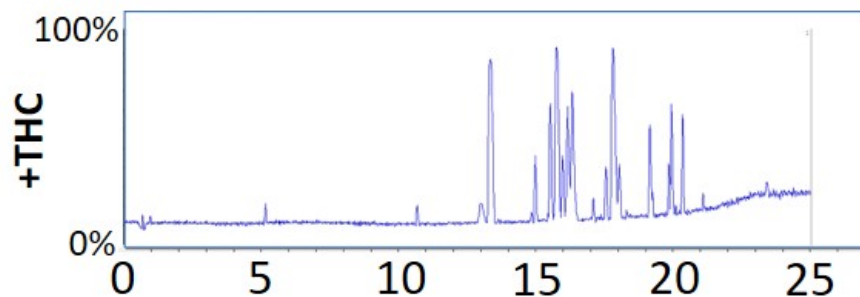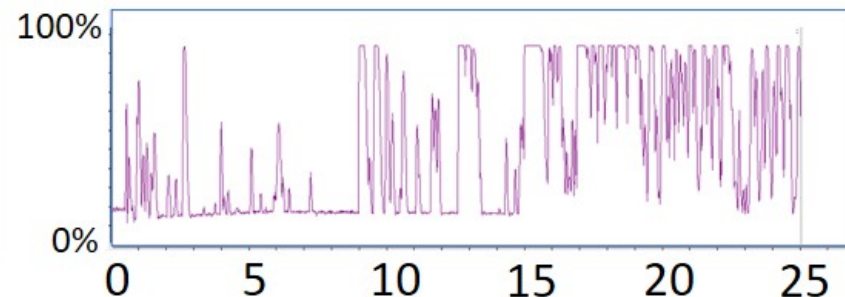

5X

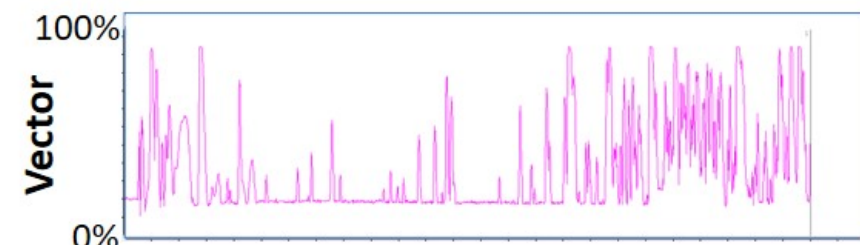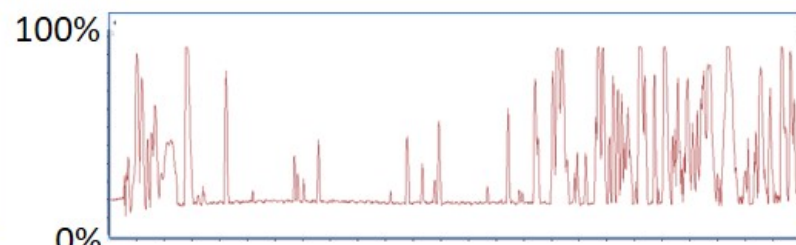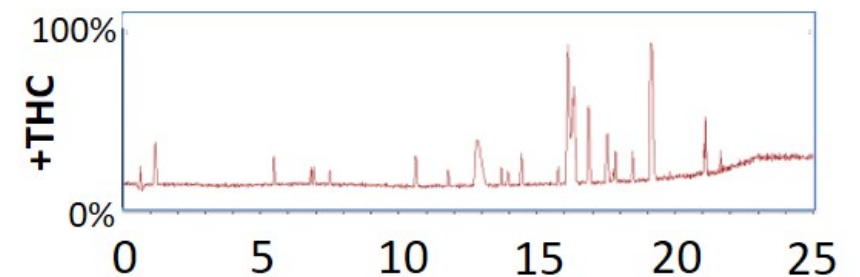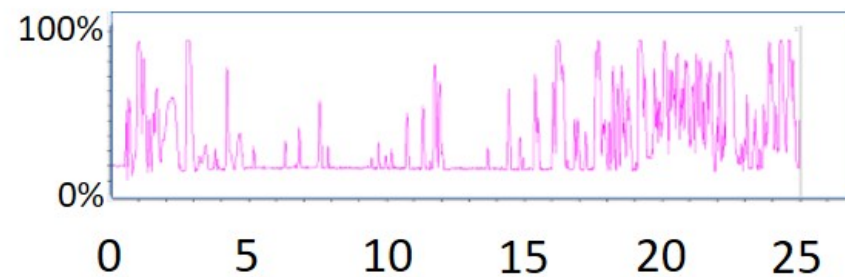

Counts vs. acquisition time (min)

12 **SI Fig 2. Representative Base peak intensity (BPI) chromatograms of fecal extracts**  
13 **in positive and negative modes using UPLC-ESI-TOF-MS.** Fecal samples (0.1g) were  
14 ultrasonically homogenized in 1mL cold methanol/water (1:1) in for 30mins followed by  
15 vortexing on cooled (4°C) mixer for five mins. The homogenized samples were centrifuged  
16 (10000xg, 4°C, 10 min). The supernatant (300 µL) was dried in a vacuum concentrator  
17 and re-dissolved in 150µL methanol/water (1:1) prior to analysis. Metabolites were  
18 separated from injected samples (5 µL aliquots) using Ultra Performance Liquid  
19 Chromatograph (1290 Infinity Binary LC System, Agilent Technologies, USA) and  
20 screened with ESI-MS (targeted MS/MS mode). The mobile phase consisted of 0.1%  
21 formic acid-water (solvent A) and 0.1% formic acid-acetonitrile (solvent B) with a gradient  
22 elution (0–1min, 95% A; 1–6min, 95–70% A; 6–20min, 70–5% A). The flow rate of the  
23 mobile phase was set at 0.5mL·min<sup>-1</sup>. The column temperature was maintained at 45°C,  
24 and the sample manager temperature was set at 4°C.  
25  
26

**1 X**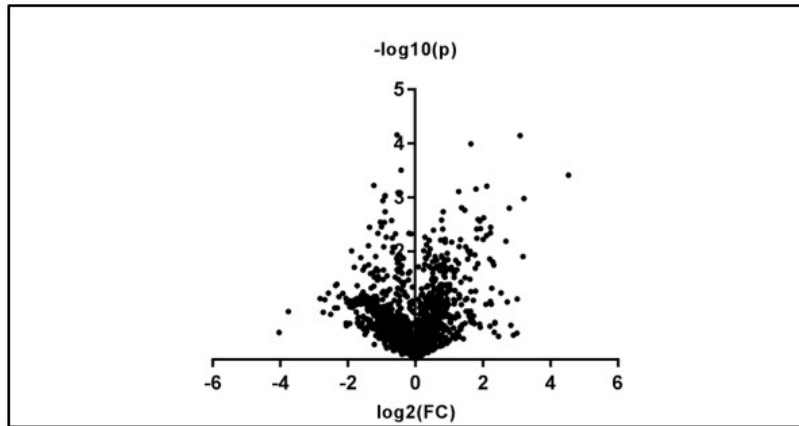**5 X**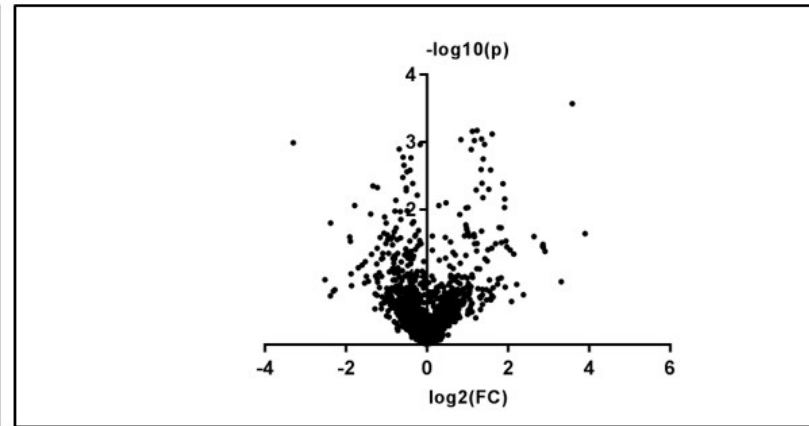**b.**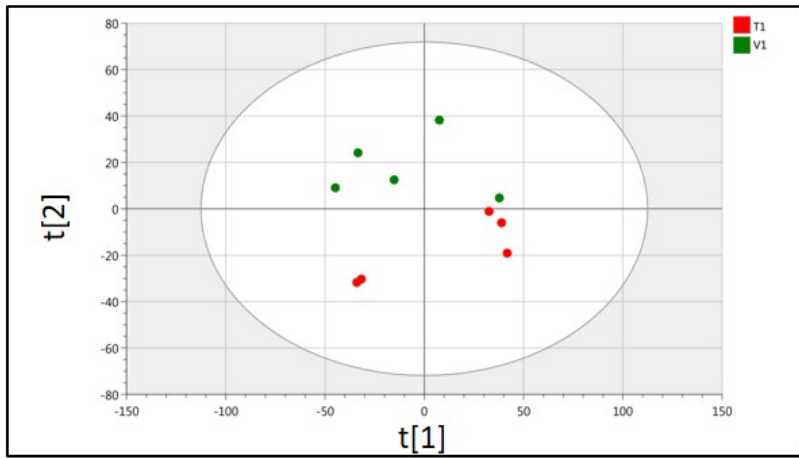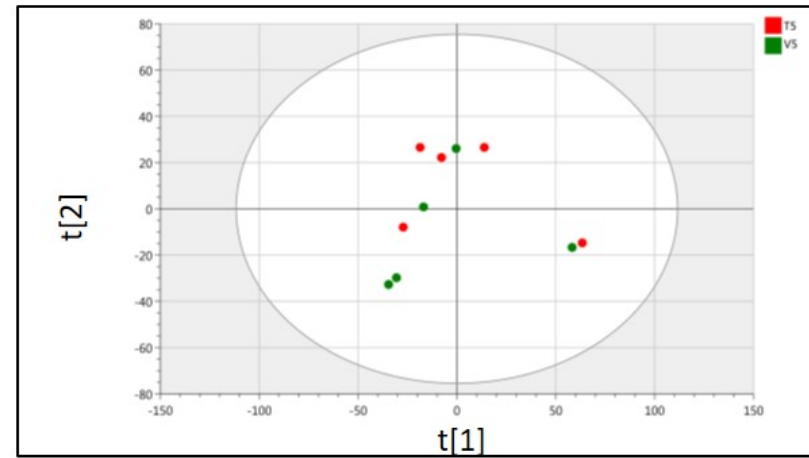**c.**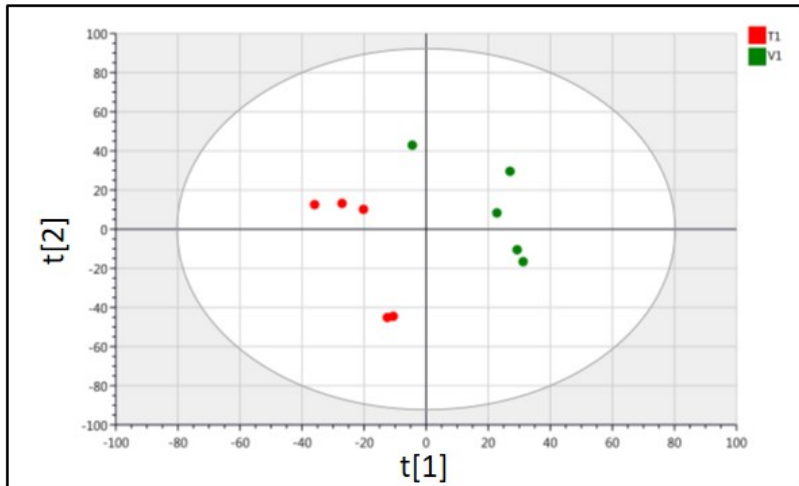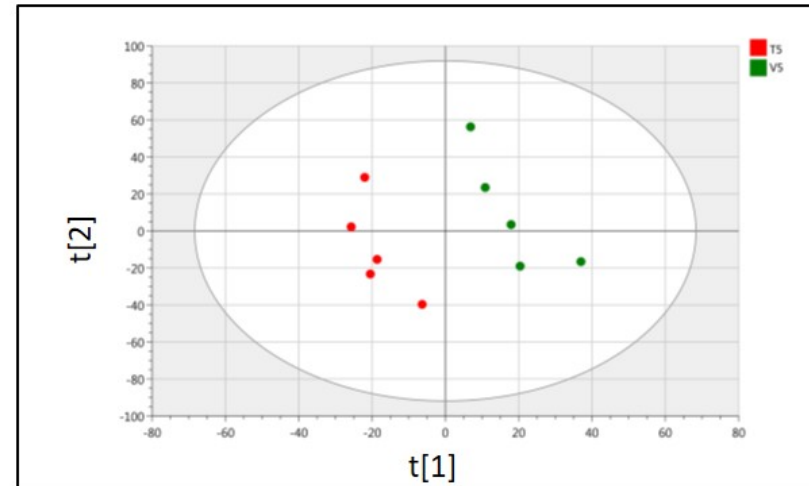

27 **SI Fig 3. Intestinal tissue metabolome comparisons between THC and vector**  
28 **administered mice.** a) Volcano plots from 1X and 5X samples showing the metabolites  
29 with differential abundance between THC treated mice and the controls. These were  
30 selected based on fold change (X-axis) and p-value in (Y-axis). FC, fold change; p, p-  
31 value. Metabolites with fold change (increase/decrease)  $\geq 2.0$  and p-value  $\leq 0.05$  in THC  
32 administered mice compared to the vehicle controls and were selected for further  
33 characterization. b) PCA score scatter plots of 1X and 5X samples based on tissue  
34 metabolic profiling of THC (n = 5) and vehicle control (n = 5) mice c) PLS-DA score scatter  
35 plots of 1X and 5X samples based on tissue metabolic profiling of THC (n = 5) and vehicle  
36 control (n = 5) mice. T, THC administered mice, C, vehicle control mice.  
37  
38
